# Supplementary material for: Characterization of Dissolved Organic Matter Released from Aged Biochar: A Comparative Study of Two Feedstocks and Multiple Aging Approaches
Source: MDPI journal article supplement (doi:10.3390/molecules28114558), 2023-06-05
Supplement: s1 [file s1]

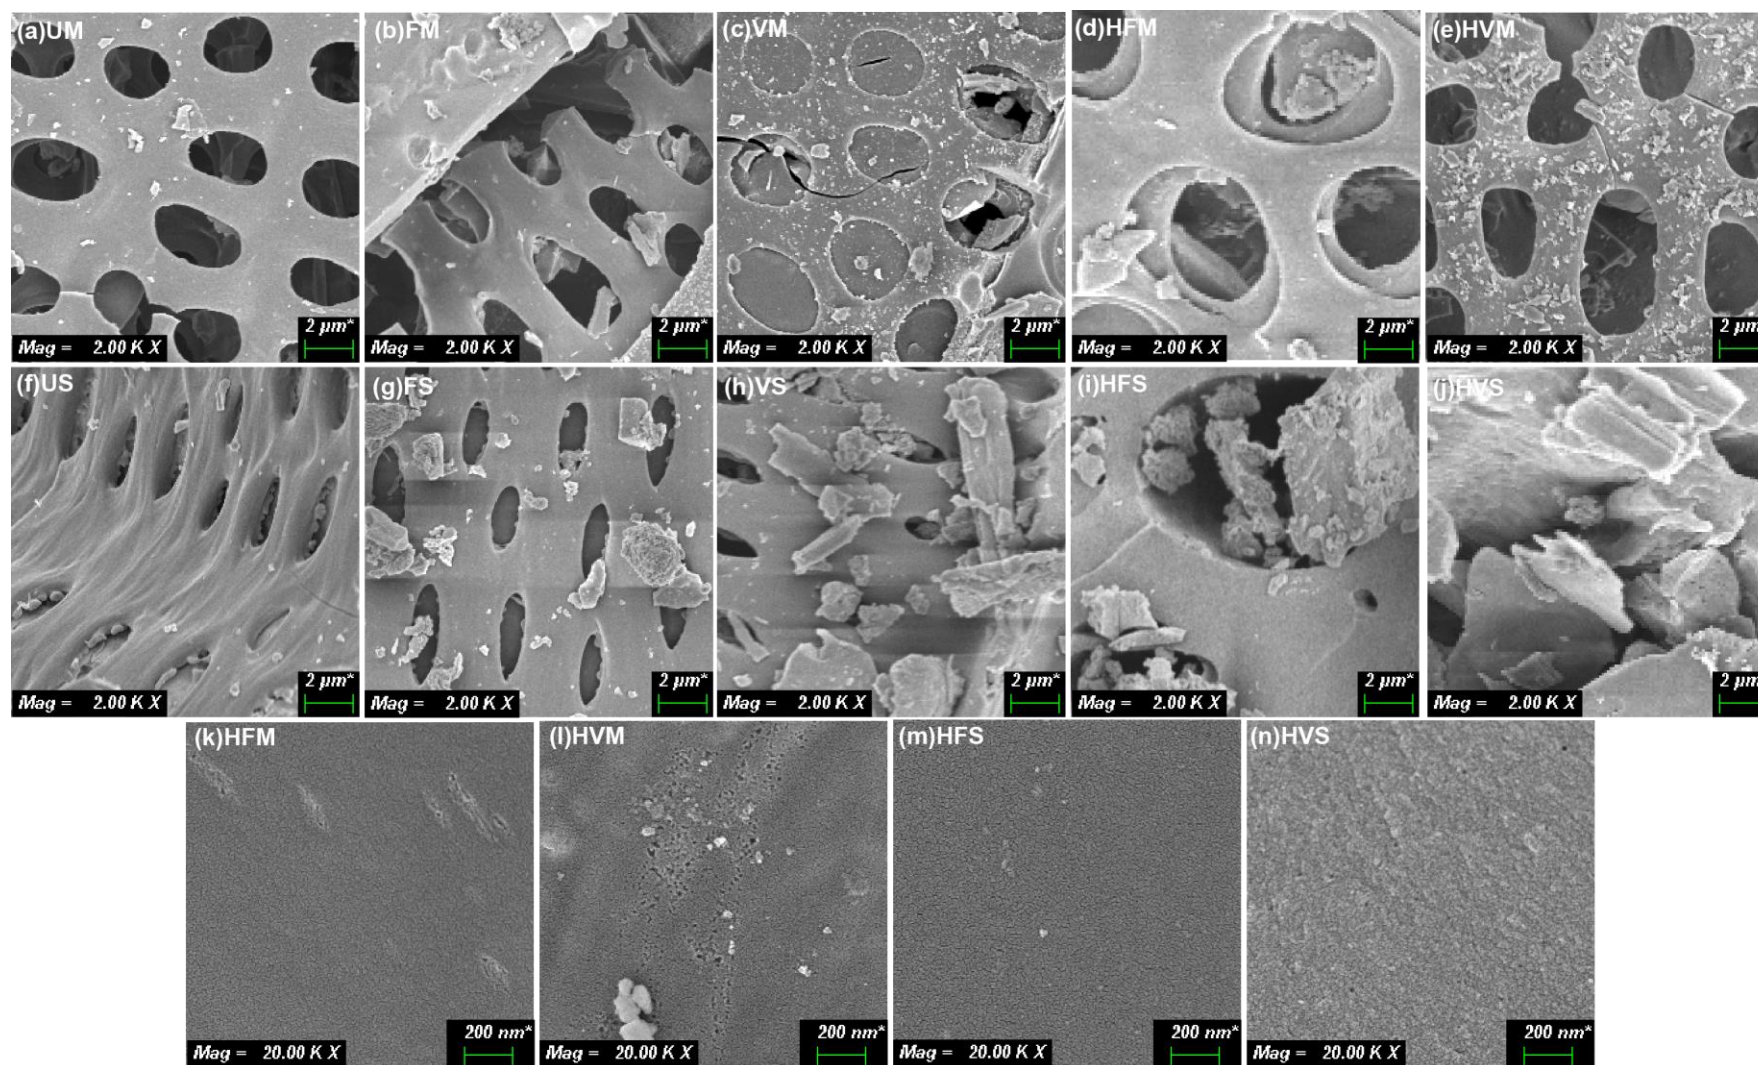

**Figure S1.** Scanning electron microscopy (SEM) for maize stalk and soybean straw biochars aged by different solutions: ultrapure water (UM, US), farmland soil solution (FM, FS), vegetable soil solution (VM, VS), and soil solution with hydrogen peroxide (H<sub>2</sub>O<sub>2</sub>) (HFM, HFS, HVM, HVS).

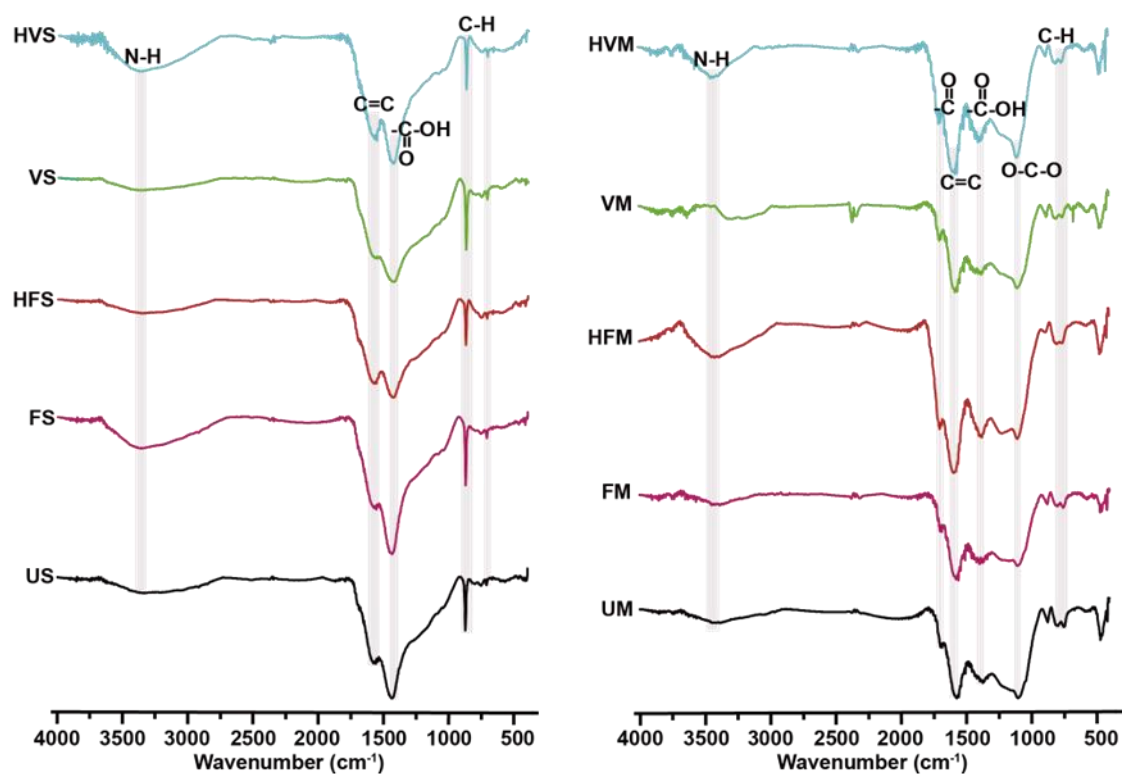

**Figure S2.** Fourier transform infrared spectroscopy (FTIR) for maize stalk and soybean straw biochars aged by different solutions: ultrapure water (UM, US), farmland soil solution (FM, FS), vegetable soil solution (VM, VS), and soil solution with hydrogen peroxide ( $\text{H}_2\text{O}_2$ ) (HFM, HFS, HVM, HVS).

**Table S1** Spectroscopic parameters, indices, and matrices used in this study for DOM characterization.

| Spectroscopic parameters | Description                                                                                                                                            |
|--------------------------|--------------------------------------------------------------------------------------------------------------------------------------------------------|
| $A_{254}$                | Non normalized absorbance at wavelength of 254 nm [42]                                                                                                 |
| $A_{300}$                | Non normalized absorbance at wavelength of 300 nm [22]                                                                                                 |
| E2/E3                    | Absorption ratio between the absorbance at 250 and 365 nm [14]                                                                                         |
| $S_{295}$                | Spectral slope over the spectral band 275-295 nm [24]                                                                                                  |
| $S_R$                    | Ratio between $S_{295}$ and the absorption spectral slope over 350-400 nm [24]                                                                         |
| $SUVA_{254}$             | Specific ultraviolet absorption at 254 nm obtained by dividing $A_{254}$ by water-soluble organic carbon concentration [24]                            |
| FI                       | Ratio of emission intensities at 470 and 520 nm at an excitation wavelength of 370 nm [24]                                                             |
| BIX                      | Ratio of emission at 380-430 nm at an excitation wavelength of 310 nm [44]                                                                             |
| HIX                      | Area under the emission spectra 435–480 nm divided by the peak area over two spectral bands of 300–345 and 435–480 nm, at an excitation of 254 nm [44] |
